# Supplementary material
Source: Springer Nature journal article supplement (https://www.springermedizin.de/resource/supplementary/13012_2012_546_MOESM1_ESM.pdf/9630006)

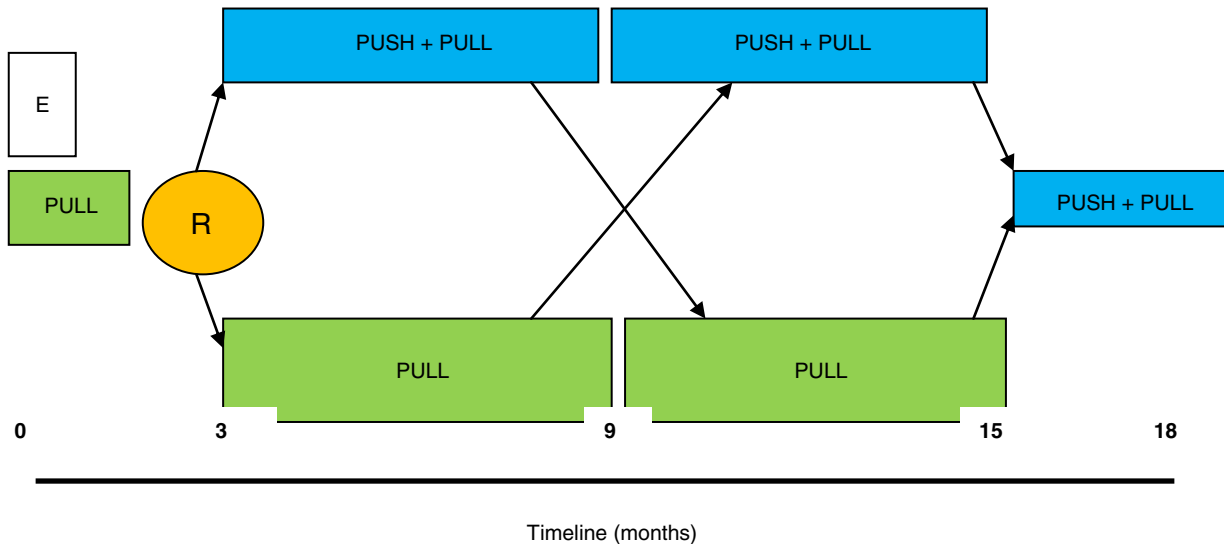

Legend: E = Enrollment; R = Randomization

Supplement: MOESM1 [file 9630006]
